# Supplementary material for: Metformin is associated with improved clinical outcomes in patients with melanoma: a retrospective, multi-institutional study
Source: PubMed Central journal article supplement (PMC10312386; doi:10.3389/fonc.2023.1075823), 2023-06-16
Supplement: DataSheet_1.pdf [file DataSheet_1.pdf]

## Supplementary Figures

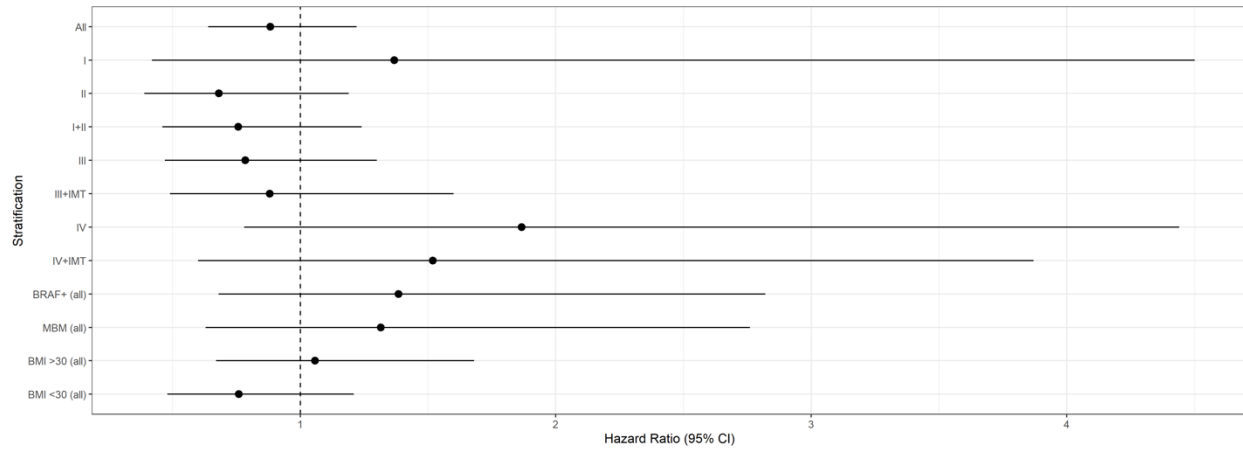

**S1.** Forest plot depicting progression free survival hazard ratios (HR) for each stage and subgroup by metformin exposure as shown in table 3

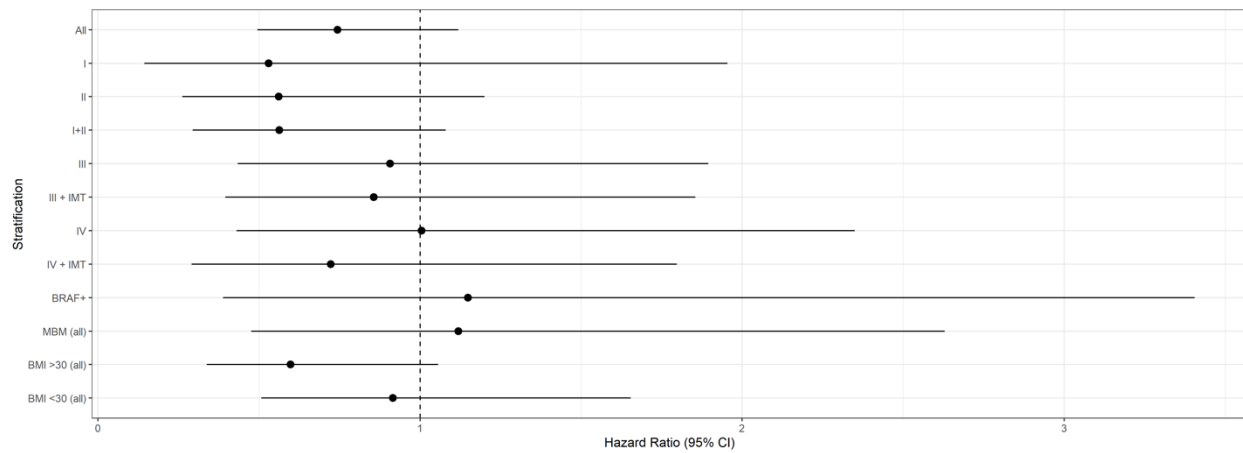

**S2.** Forest plot depicting overall survival hazard ratios (HR) for each stage and subgroup by metformin exposure as shown in table 4
